# Supplementary material for: Long-term leaching behaviours of cement composites prepared by hazardous wastes
Source: Royal Society of Chemistry journal article supplement (doi:10.1039/c8ra02773k), 2018-01-01
Supplement: c8ra02773k1.pdf [file c8ra02773k1.pdf]

1

Electronic Supplementary Information for

2

**Long-term leaching behaviours of cement composites prepared by hazardous wastes**

3

Zhenzhou Yang<sup>a</sup>, Ji, Ru<sup>d</sup>, Lili Liu<sup>a</sup>, Xidong Wang<sup>a</sup> and Zuotai Zhang<sup>b,c\*</sup>,

4

a Beijing Key Laboratory for Solid Waste Utilization and Management and Department of Energy and Resource Engineering, College of

5

Engineering, Peking University, Beijing 100871, P.R. China

6

b School of Environmental Science and Engineering, Southern University of Science and Technology of China, Shenzhen, 518055, P.R. China

7

c The Key Laboratory of Municipal Solid Waste Recycling Technology and Management of Shenzhen City, Shenzhen, 518055, P.R. China

8

d School of Civil and Resource Engineering University of Science and Technology Beijing, Beijing, 100083, P.R. China

9

\*Corresponding author.

10

E-mail address: zhangzt@sustc.edu.cn (Z.T. Zhang).

**Table S1** The pH and electrical conductivity of leachates during the course of the experiment of 180 days

| Sample           | Parameter                           | Time (days) |      |      |      |      |      |      |      |      |
|------------------|-------------------------------------|-------------|------|------|------|------|------|------|------|------|
|                  |                                     | 3           | 7    | 14   | 30   | 60   | 90   | 120  | 150  | 180  |
| Deionized water: |                                     |             |      |      |      |      |      |      |      |      |
| Compact Cc       | pH                                  | 11.7        | 11.6 | 11.5 | 11.6 | 11.5 | 11.2 | 11.3 | 11.4 | 11.4 |
|                  | Conductivity (mS cm <sup>-1</sup> ) | 0.6         | 0.8  | 0.9  | 1.0  | 0.9  | 1.0  | 1.0  | 1.0  | 0.9  |
| Coarse Cc        | pH                                  | 12.3        | 12.4 | 12.2 | 12.3 | 12.2 | 12   | 11.8 | 11.8 | 11.8 |
|                  | Conductivity (mS cm <sup>-1</sup> ) | 3.3         | 4.8  | 5.8  | 6.4  | 6.7  | 6.5  | 6.1  | 6.1  | 5.7  |
| Fine Cc          | pH                                  | 12.5        | 12.4 | 12.3 | 12.2 | 12.2 | 12.1 | 11.9 | 11.8 | 11.8 |
|                  | Conductivity (mS cm <sup>-1</sup> ) | 3.4         | 4.2  | 6.4  | 7.4  | 7.5  | 7.1  | 6.7  | 6.7  | 6.6  |
| Saline water:    |                                     |             |      |      |      |      |      |      |      |      |
| Compact Cc       | pH                                  | 11.8        | 11.9 | 11.9 | 11.5 | 12   | 11.9 | 11.6 | 11.8 | 11.8 |
|                  | Conductivity (mS cm <sup>-1</sup> ) | 44.6        | 44.7 | 44.1 | 42.1 | 41.3 | 40.4 | 39.0 | 39.8 | 39.0 |
| Coarse Cc        | pH                                  | 12.4        | 12.3 | 12.4 | 12.2 | 12.3 | 12.3 | 11.8 | 12.1 | 12.1 |
|                  | Conductivity (mS cm <sup>-1</sup> ) | 47.0        | 46.8 | 46.7 | 45.0 | 44.0 | 42.7 | 43.5 | 43.6 | 42.3 |
| Fine Cc          | pH                                  | 12.4        | 12.4 | 12.4 | 12.2 | 12.3 | 12.3 | 11.9 | 12.1 | 12.1 |
|                  | Conductivity (mS cm <sup>-1</sup> ) | 47.0        | 46.9 | 47.1 | 45.3 | 44.2 | 42.9 | 43.7 | 44.0 | 42.6 |

12 **Table S2** The porosity, average pore diameter and total intrusion volume of compact compistes prepared with EOPC, after 180 days of  
13 exposure to deionized water and saline water.

| Sample               | Porosity (%) | Average pore diameter (nm) | Total pore volume (mL/g) |
|----------------------|--------------|----------------------------|--------------------------|
| Cc (Deionized water) | 12.7         | 27.9                       | 0.064                    |
| Cc (Saline water)    | 11.7         | 33.7                       | 0.051                    |

14  
15

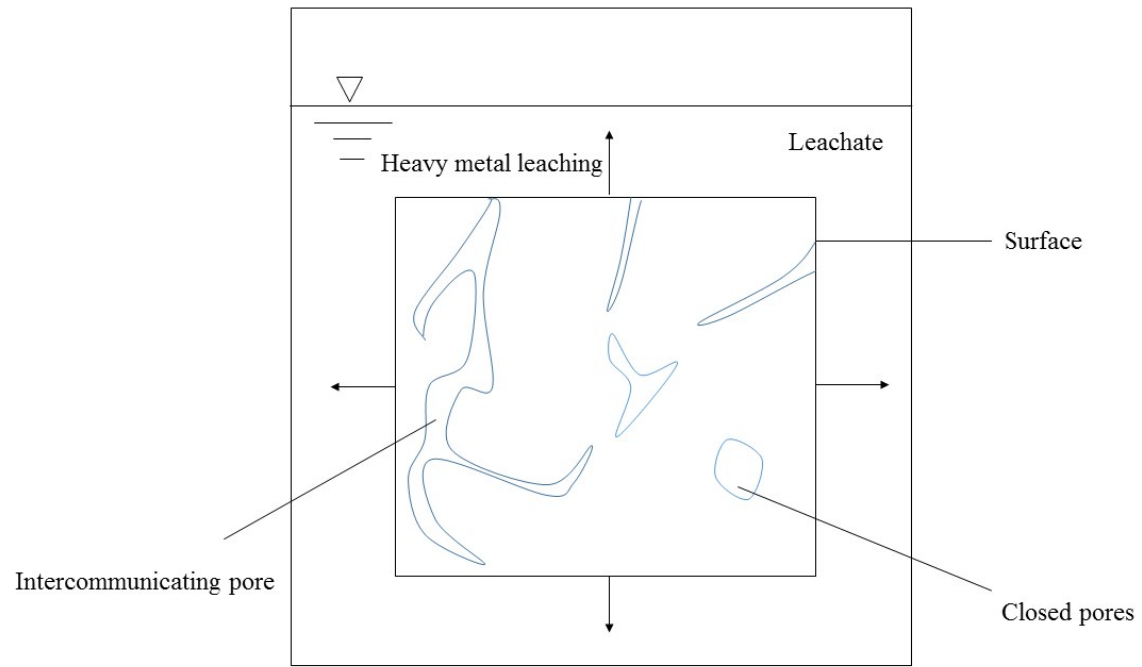

16

17

**Fig. S1** Sketch of the leaching behavior of heavy metals in cement composites

18
